# Supplementary material for: The AAA ATPase Afg1 preserves mitochondrial fidelity and cellular health by maintaining mitochondrial matrix proteostasis
Source: Oxford University Press journal article supplement (doi:10.1242/jcs.219956), 2018-10-09
Supplement: jcs219956supp.pdf [file jcs219956supp.pdf]

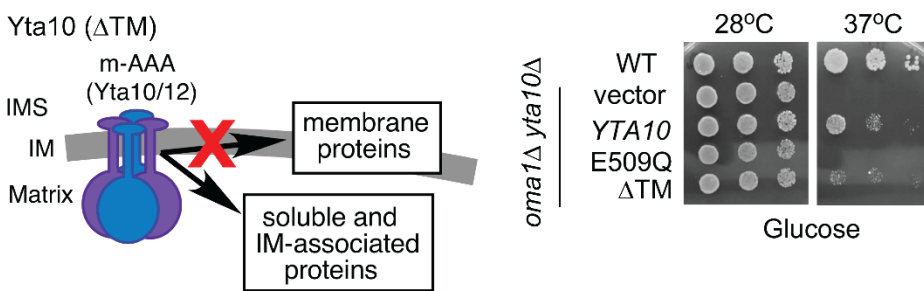

**Figure S1. Simultaneous loss of Oma1 and Yta10 impairs proteolysis of intrinsic IM proteins.** Left, schematic depiction of functional impairment in the m-AAA protease harboring the Yta10( $\Delta$ TM) subunit lacking transmembrane segments. Right, fermentative growth of WT or *oma1* $\Delta$  *yta10* $\Delta$  cells expressing the indicated Yta10 variants, handled and analyzed as in Figure 1A.

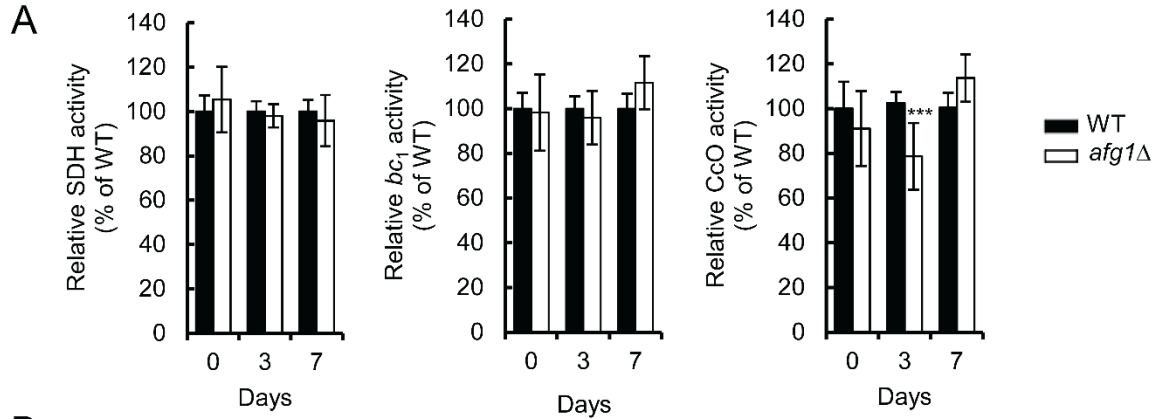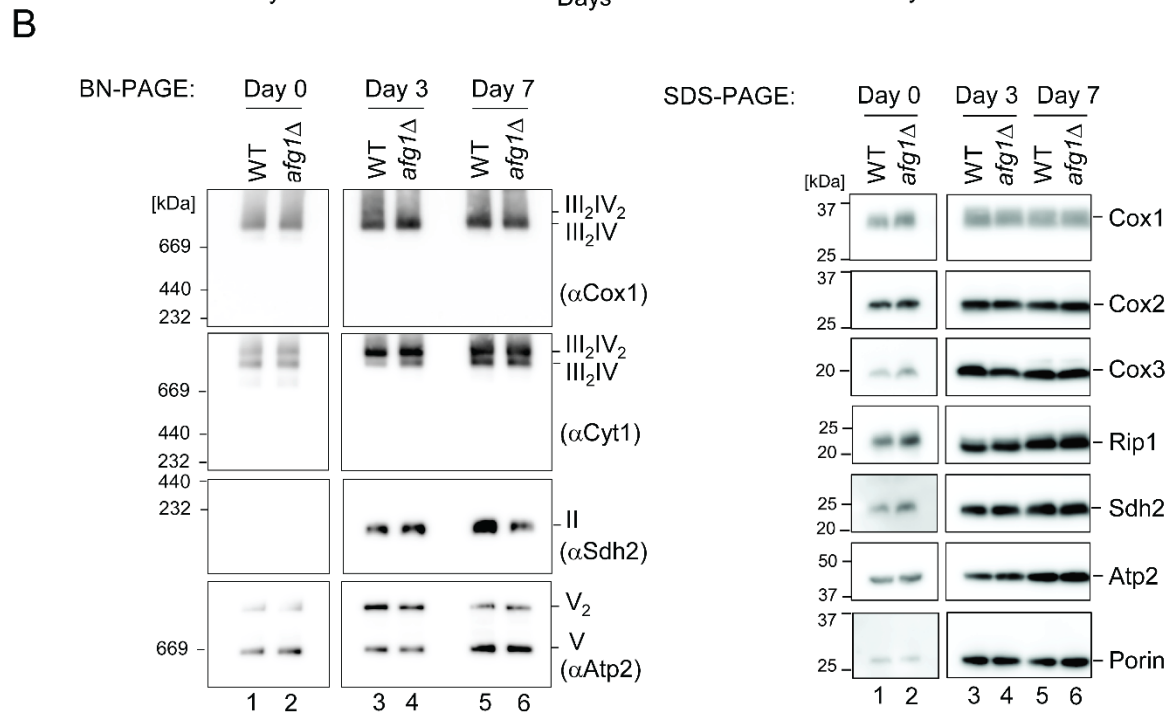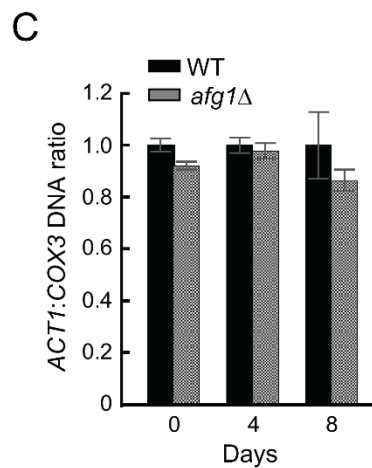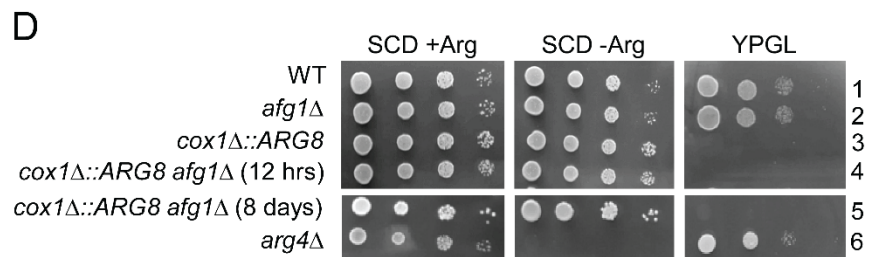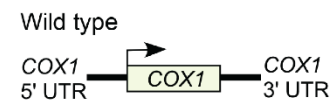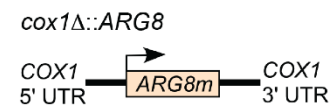

**Figure S2. ETC enzymatic activities, complexes, and subunits in the absence of Afg1 are similar to WT, and cells lacking Afg1 retain mitochondrial genome with aging, similarly to WT.** (A) Succinate dehydrogenase (SDH), cytochrome *bc<sub>1</sub>* complex (*bc<sub>1</sub>*), and cytochrome *c* oxidase (CcO) specific enzymatic activities in mitochondria from WT and *afg1Δ* cells isolated at indicated growth times, shown as a percentage of WT activity. Data are mean ± S.D. (n=3 biological replicates, each with n=3-4 technical replicates; \*\*\*p<0.001 by one-way ANOVA). (B) Left, Blue native (BN)-PAGE immunoblot analysis of respiratory complexes in mitochondria from cells isolated at indicated growth times, detected with indicated antibodies. Right, SDS-PAGE immunoblot analysis of representative subunits of respiratory complexes IV (CcO; Cox1-3), III (*bc<sub>1</sub>*; Rip1), II (SDH; Sdh2), and V (Atp2) and loading control (Porin) in mitochondria from these cells. (C) Mitochondrial DNA copy number of WT and *afg1Δ* strains grown in SC-glucose medium for the indicated number of days and analyzed by qPCR. The copy number was calculated as the nuclear (*ACT1* gene) to mitochondrial (*COX3* gene) DNA ratio and was set equal to one for WT samples. Data are mean values ± SD of 3 independent experiments, each with n=3 technical replicates. (D) Translation of the *COX1* ORF from the mitochondrial genome in young (12 hours post-inoculation) and aged (8 days post-inoculation) WT and *afg1Δ* cells, assessed by deleting *AFG1* in the *cox1Δ::ARG8* genetic reporter strain depicted schematically. Cells were cultured in SC-glucose medium supplemented with low amounts (4 mg/L) of arginine for the indicated periods of time and spotted onto SC-glucose (SCD) plates with (+Arg) or without (-Arg) arginine as well as on yeast extract-peptone-glycerol/lactate (YPGL) plates. The *arg4Δ* mutant served as a control. Plates were incubated for 3 (SCD plates) or 4 (YPGL plates) days at 28°C before photography. UTR, untranslated region.

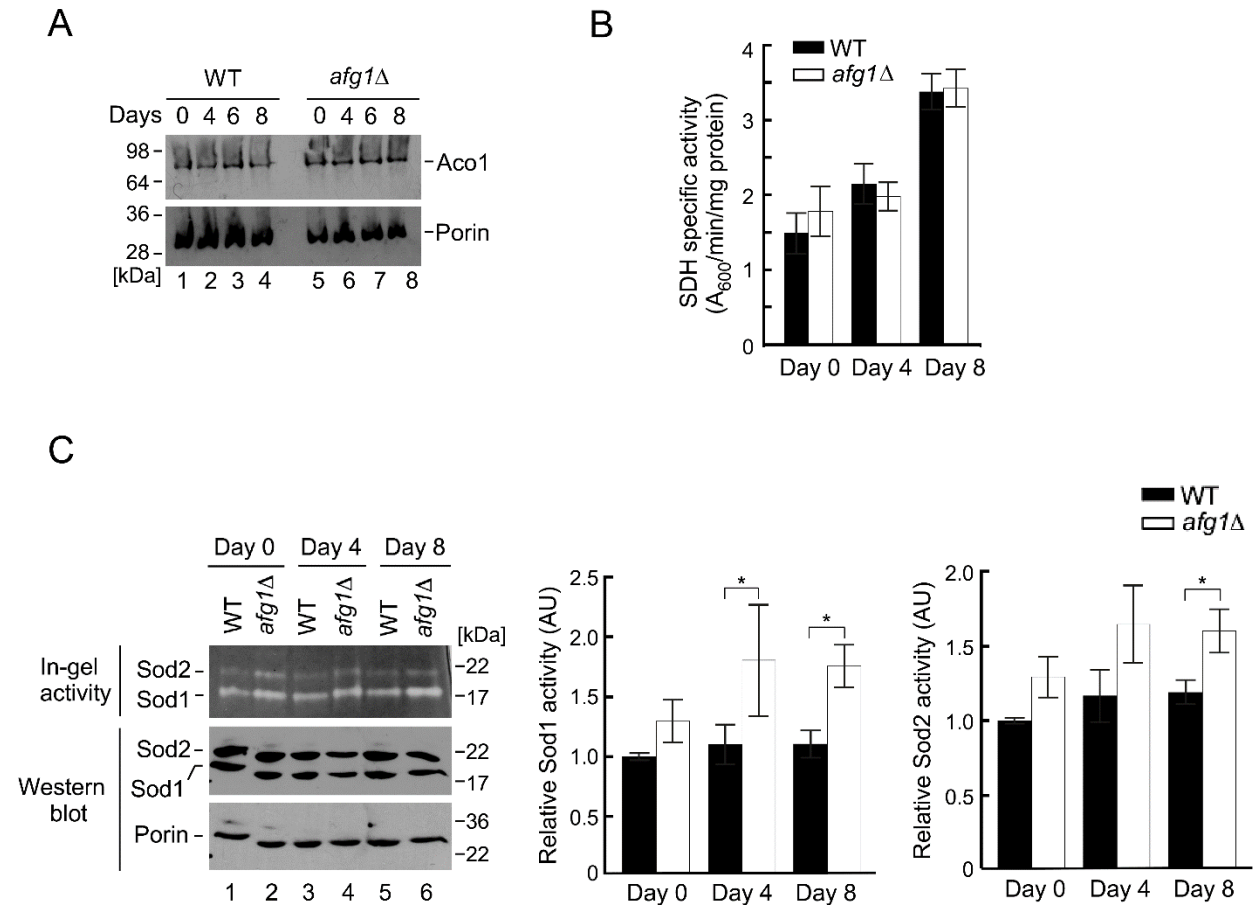

**Figure S3. Loss of Afg1 does not impair aconitase steady-state levels or succinate dehydrogenase activity, while superoxide dismutase activity is elevated in aged cells lacking Afg1.** (A) SDS-PAGE immunoblot analysis of the steady-state levels of aconitase (Aco1) and porin (loading control) in mitochondria described in Figure 3B. (B) Succinate dehydrogenase (SDH) enzymatic activity in mitochondria isolated from log-phase and 4- and 8-day-old WT and *afg1Δ* cells. Data are mean values  $\pm$  SD of 3 independent experiments, each with n=3 technical replicates. (C) In-gel analysis of superoxide dismutase activity following native electrophoresis and assessment of steady-state levels of Sod1, Sod2, and porin following SDS-PAGE in the mitochondria described in Figure 3B. Quantitation of Sod1 and Sod2 in-gel staining signals is mean  $\pm$  SD of 3 independent experiments, each with n=3 technical replicates; \*p<0.05 by *t*-test.

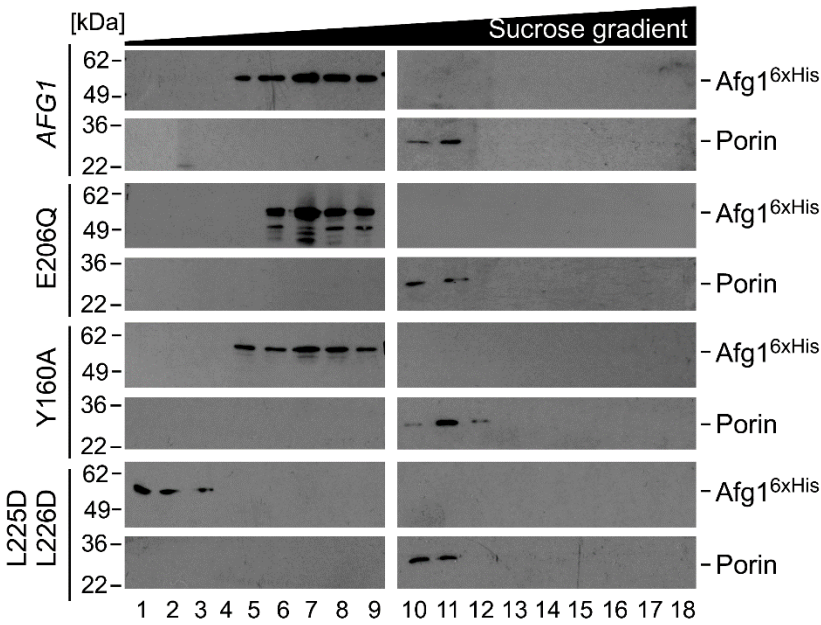

**Figure S4. E206Q and Y160A variants of Afg1 are able to oligomerize.** High-velocity fractionation of mitochondrial proteins from *afg1Δ* cells expressing Afg1-6xHis or its E206Q, Y160A, or L225D L226D variants solubilized with 1% digitonin. Following centrifugation on continuous sucrose density gradients (12-50%), gradient fractions were collected and analyzed by SDS-PAGE for distribution of Afg1 oligomers using anti-His antibody. The migration pattern of the 440-kDa porin complex (visualized with anti-porin antibody) was used for size comparison.

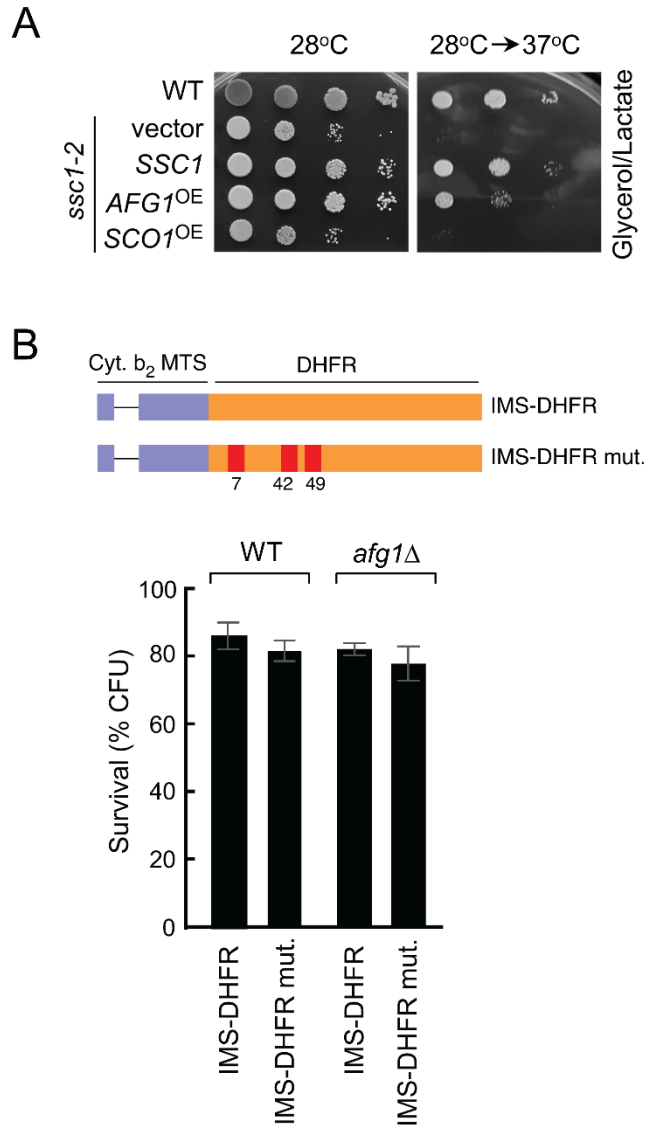

**Figure S5. *Afg1* over-expression partially compensates for the *ssc1-2* mutation, and a misfolding-prone protein targeted to the IMS in *afg1*Δ does not induce the growth defect observed for the matrix-targeted version.** (A) Respiratory growth of WT and *ssc1-2* cells expressing vector control or *SSC1* or overexpressing *AFG1* or *SCO1* (negative control). Cells were handled as described in Figure 1A. (B) Top, schematic depiction of IMS-targeted DHFR chimeric protein consisting of the mitochondrial targeting/sorting moiety of yeast cytochrome *b*<sub>2</sub> (Cyt. *b*<sub>2</sub>) fused to wild type (IMS-DHFR) or the misfolding-prone C7A, S42C, N49C variant of mouse DHFR (IMS-DHFR mut.). Bottom, colony viability of the indicated WT and *afg1*Δ transformants, assessed as described in Figure 5E. Data are mean values ± SD of 3 biological replicates, each with n=3 technical replicates.

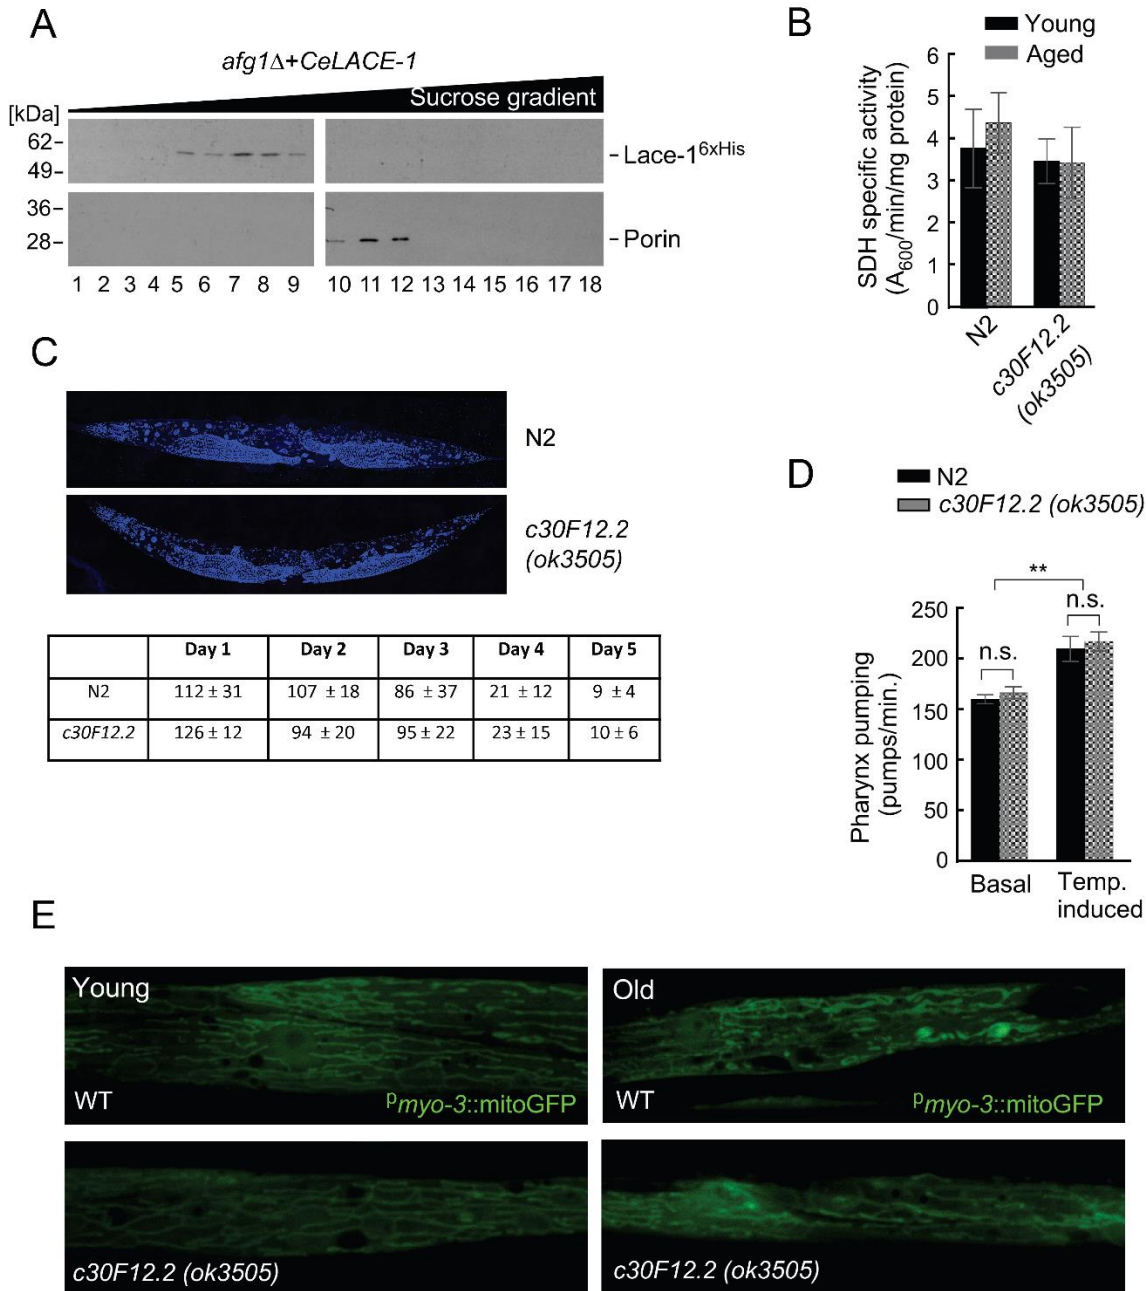

**Figure S6. LACE-1 forms complexes similar to Afg1; worms lacking LACE-1 exhibit normal SDH activity, normal developmental phenotypes, normal basal and temperature-induced pharyngeal pumping rates, and normal muscle tissue mitochondrial networks.**

(A) Density gradient fractionation of digitonin-solubilized mitochondria from yeast *afg1Δ* cells expressing C-terminally 6xHis-tagged *C. elegans* LACE-1 (*CeLACE-1*). The lysates were handled and analyzed as in Figure S4. (B) Enzymatic activity of succinate dehydrogenase in

mitochondria isolated from 1-day-old (young) and 5-day-old (aged) N2 and *c30F12.2(ok3505)* worms. Data are mean values  $\pm$  SD (n=3 biological replicates with 3 animals per group). (C) Top, confocal micrographs (projected Z-sections) showing DAPI-stained N2 and *c30F12.2(ok3505)* animals. Bottom, average brood size of N2 animals and *c30F12.2(ok3505)* animals over 5 days. (D) Frequency of basal and temperature-induced pharynx movement (pumping) per minute in age-matched N2 and *c30F12.2(ok3505)* animals at day 1; n=3 with 10 animals per group. Data are mean values  $\pm$  S.E.M.; n.s., not significant, \*\*p<0.01 by *t*-test. (E) Representative fluorescence images of body wall muscle in age-matched WT and *c30F12.2(ok3505)* animals expressing  $P_{myo-3}::mitoGFP$  mitochondria-targeted reporter at day 1 (young) and day 5 (old).



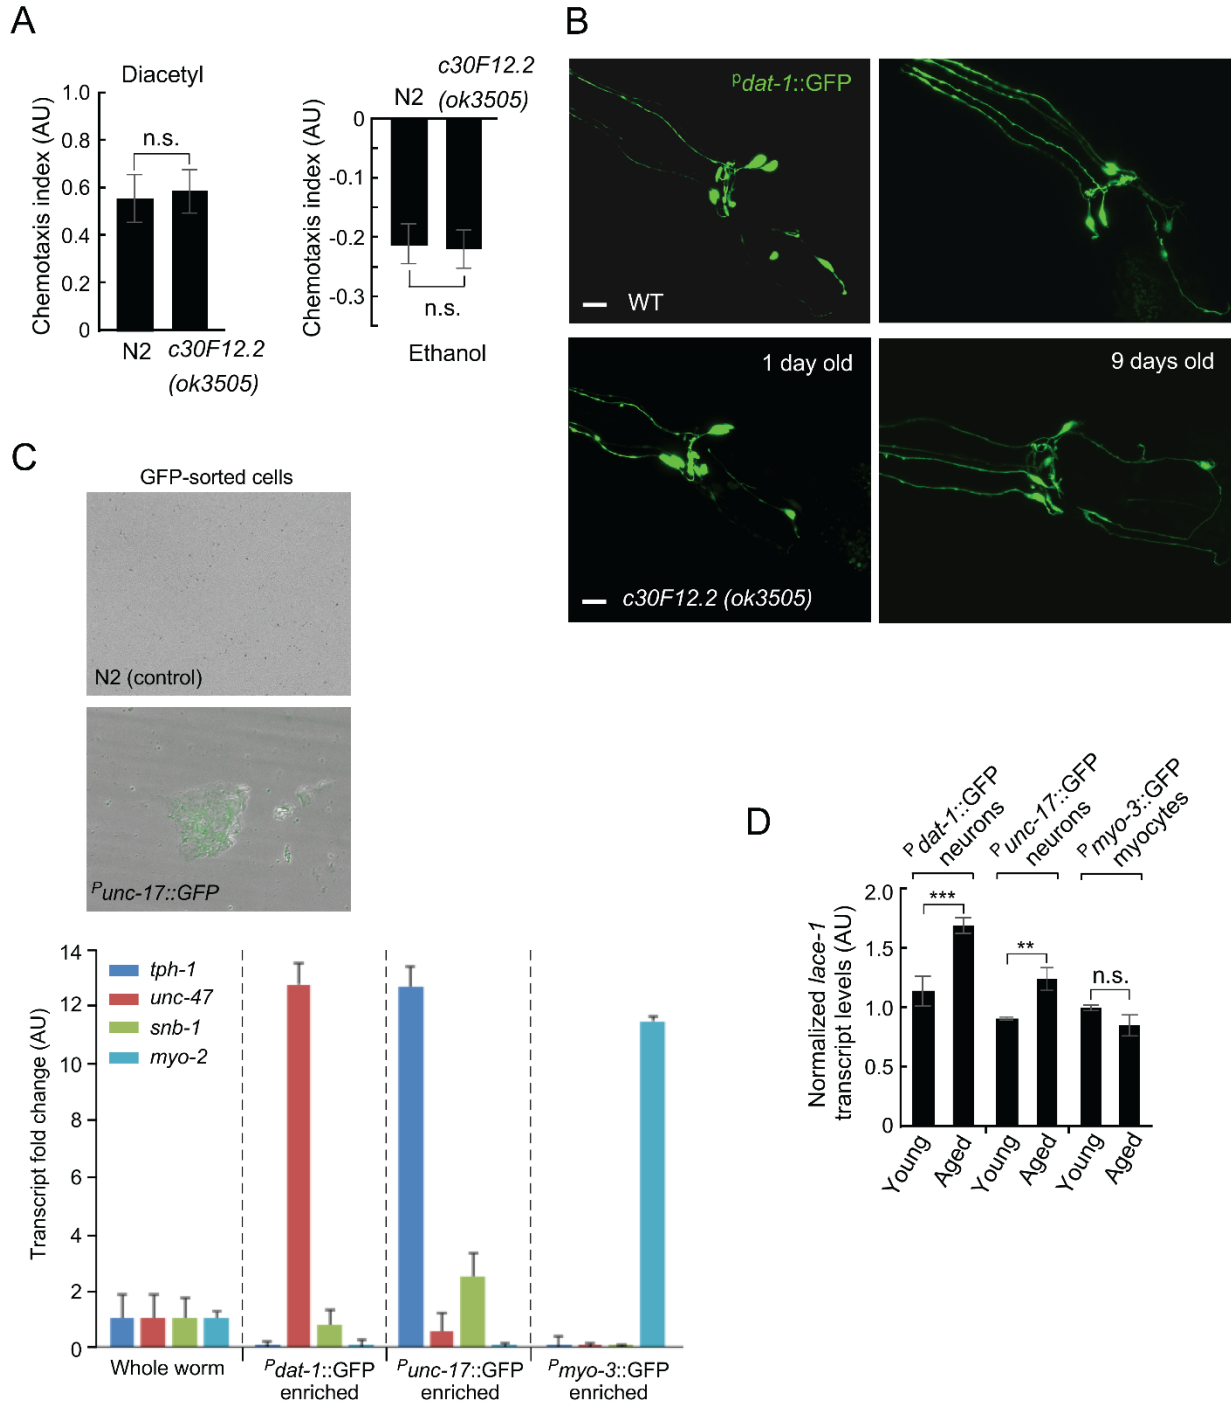

**Figure S7. Worms lacking LACE-1 exhibit normal chemosensing and normal dopaminergic neurons; qPCR validates cell type following the isolation of GFP-sorted cells; worms exhibit increased expression of *lace-1* in neurons but not myocytes with aging.** (A) Chemotaxis index of N2 and *c30F12.2(ok3505)* animals at Day 1. Worm responses

were tested for both attractive (diacetyl) and repulsive (ethanol) odorants; n=3 with 20 animals per group. Data are mean values  $\pm$  S.E.M.; n.s., not significant by *t*-test. (B) Representative fluorescence images of dopaminergic neurons in 1-day-old (left) and 9-day-old (right) adult WT and *c30F12.2(ok3505)* animals expressing  $P^{dat-1::GFP}$  reporter. (C) qPCR analysis of transcripts for the genes *tph-1*, *unc-47*, and *snb-1* (markers for neurons), and *myo-2* (marker for myocytes) and epifluorescent microscopy images showing the presence of GFP in the isolated cells. Image shows a single focal plane. (D) Transcript levels of *lace-1* in dopaminergic  $P^{dat-1::GFP}$  neurons, cholinergic  $P^{unc-17::GFP}$  neurons, and  $P^{myo-3::GFP}$  myocytes isolated from relevant 1-day-old (young) and 5-day-old (aged) WT transgenic animals. Data are mean values  $\pm$  SD (n=4 biological replicates with 4 animals per group; n.s., not significant, \*\*p<0.01, \*\*\*p<0.001 by *t*-test).

**Table S1. Yeast strains used in this study**

| Strain                                   | Genotype                                                                                            | Reference/Source            |
|------------------------------------------|-----------------------------------------------------------------------------------------------------|-----------------------------|
| W303-1B                                  | <i>MATα ade2-1 can1-100 his3-11, 15 leu2-3, 112 trp1-1 ura3-1</i>                                   | ATCC                        |
| W303-1B<br><i>afg1 Δ</i>                 | <i>MATα ade2-1 can1-100 his3-11, 15 leu2-3, 112 trp1-1 ura3-1 afg1Δ::URA3MX</i>                     | This Study                  |
| W303-1B<br><i>oma1 Δ</i>                 | <i>MATα ade2-1 can1-100 his3-11, 15 leu2-3, 112 trp1-1 ura3-1 oma1Δ::HIS3MX6MX</i>                  | Bohovych et al., 2014       |
| <i>afg1 Δ oma1 Δ</i>                     | <i>MATα ade2-1 can1-100 his3-11, 15 leu2-3, 112 trp1-1 ura3-1 afg1Δ oma1Δ::URA3MX</i>               | This Study                  |
| W303-1B<br><i>yta10Δ</i>                 | <i>MATα ade2-1 can1-100 his3-11, 15 leu2-3, 112 trp1-1 ura3-1 yta10Δ::HIS3MX6</i>                   | B. Meunier                  |
| <i>yta10Δ oma1Δ</i>                      | <i>MATα ade2-1 his3-1,15 leu2-3,112 trp1-1 ura3-1 yta10Δ::HIS3MX6 oma1Δ::TRP1</i>                   | This study                  |
| MB3 ( <i>tim23-2</i> )                   | <i>MATα ade2-101 his3-Δ200 leu2-Δ1 lys2-801 ura3::LYS2 tim23-2</i>                                  | N. Pfanner                  |
| <i>cox1 Δ::ARG8</i>                      | <i>MATα lys2 leu2-3, 112 arg8::hisG, ura3-52 [cox1Δ::ARG8m]</i>                                     | Perez-Martinez et al., 2003 |
| <i>cox1 Δ::ARG8</i><br><i>afg1 Δ</i>     | <i>MATα lys2 leu2-3, 112 arg8::hisG, ura3-52 [cox1Δ::ARG8m] afg1::URA3MX</i>                        | This study                  |
| DTY 833<br>( <i>arg4Δ</i> )              | <i>MATα ade1Δ arg4Δ aro2Δ his7Δ lys5Δ ura2Δ</i>                                                     | D. Winge                    |
| MB4-1b<br>( <i>sod2Δ</i> )               | <i>MATα leu2-3,112 trp1-1 can1-100 ura3-1 ade2-1 his3-11,15 sod2Δ::KanMX</i>                        | A. Barrientos               |
| <i>afg1 Δ sod2 Δ</i>                     | <i>MATα ade2-1 can1-100 his3-11, 15 leu2-3, 112 trp1-1 ura3-1 afg1ΔSod2Δ::URA3MX</i>                | This Study                  |
| PK81 ( <i>Ssc1-2</i> )                   | <i>MATα his4-713 lys2 ura3-52 Δtrp1 leu2-3,112 ssc1-2::LEU2</i>                                     | A. Barrientos               |
| <i>AFG1::6His</i>                        | <i>MATα ade2-1 can1-100 his3-11, 15 leu2-3, 112 trp1-1 ura3-1 AFG1-His6::URA3MX</i>                 | This Study                  |
| <i>AFG1::6His</i><br><i>afg1Δ</i>        | <i>MATα ade2-1 can1-100 his3-11, 15 leu2-3, 112 trp1-1 ura3-1 AFG1-His6::URA3MX afg1Δ</i>           | This Study                  |
| <i>AFG1::6His</i><br><i>yta10Δ oma1Δ</i> | <i>MATα ade2-1 his3-1,15 leu2-3,112 trp1-1 ura3-1 AFG1-His6::URA3MX yta10Δ::HIS3MX6 oma1Δ::TRP1</i> | This study                  |
| <i>AFG1::6His</i><br><i>PK81</i>         | <i>MATα his4-713 lys2 ura3-52 Δtrp1 leu2-3,112 ssc1-2::LEU2 AFG1-His6::URA3MX</i>                   | This Study                  |
| <i>SSC1::6His</i><br><i>PK81</i>         | <i>MATα his4-713 lys2 ura3-52 Δtrp1 leu2-3,112 ssc1-2::LEU2 SSC1-His6::URA3MX</i>                   | This Study                  |
| <i>SCO1::HA</i><br><i>PK81</i>           | <i>MATα his4-713 lys2 ura3-52 Δtrp1 leu2-3,112 ssc1-2::LEU2 SCO1-HA::HIS3</i>                       | This Study                  |
